1 **Full title:** *Saliva molecular testing bypassing RNA extraction is suitable for monitoring*  
2 *and diagnosing SARS-CoV-2 infection in children*

3

4 **Authors:** Marta Alenquer<sup>1</sup>, Tiago Milheiro Silva<sup>2, §</sup>, Onome Akpogheneta<sup>3, §</sup>, Filipe  
5 Ferreira<sup>1</sup>, Sílvia Vale-Costa<sup>1</sup>, Mónica Medina-Lopes<sup>1</sup>, Frederico Batista<sup>4</sup>, Ana Margarida  
6 Garcia<sup>2</sup>, Vasco M. Barreto<sup>5</sup>, Cathy Paulino<sup>6</sup>, João Costa<sup>6</sup>, João Sobral<sup>6</sup>, Maria Diniz-da-  
7 Costa<sup>6</sup>, Susana Ladeiro<sup>6</sup>, José Delgado Alves<sup>4,5</sup>, Ricardo B. Leite<sup>6</sup>, Jocelyne Demengeot<sup>3</sup>,  
8 Maria João Rocha Brito<sup>2</sup>, and Maria João Amorim<sup>1,\*</sup>

9

10 **Affiliations:**

11 <sup>1</sup> Cell Biology of Viral Infection Lab, Instituto Gulbenkian de Ciência; Oeiras, Portugal

12 <sup>2</sup> Pediatric Infectious Disease Unit, Hospital Dona Estefânia, Centro Hospitalar de Lisboa  
13 Central; Lisboa, Portugal.

14 <sup>3</sup> Lymphocyte Physiology Lab, Instituto Gulbenkian de Ciência; Oeiras, Portugal.

15 <sup>4</sup> Department of Medicine 4, Hospital Prof Doutor Fernando Fonseca; Amadora, Portugal.

16 <sup>5</sup> CEDOC NOVA, Centro de Estudos de Doenças Crónicas, Nova Medical School,  
17 Universidade Nova de Lisboa; Lisboa, Portugal.

18 <sup>6</sup> Genomics Unit, Instituto Gulbenkian de Ciência; Oeiras, Portugal.

19

20 § These authors contributed equally to this work

21 \*Corresponding author. Email: [mjamorim@igc.gulbenkian.pt](mailto:mjamorim@igc.gulbenkian.pt)

22

23 **Key Points**

24 **Question:** Is saliva reverse transcription-quantitative polymerase chain reaction (RT-qPCR)  
25 testing (with and without RNA extraction) suitable to identify SARS-CoV-2 infected young  
26 children and can the cycle threshold (CT) be associated with infectivity in a heterogeneous  
27 population admitted to hospital for COVID-19-related and unrelated reasons?

28 **Findings:** In this cross-sectional study of 85 children aged 10 years and under, RT-qPCR in  
29 saliva samples subjected or not to RNA extraction accurately detected SARS-CoV-2 RNA  
30 and infectious viruses could be recovered from CTs below 26.

31 **Meaning:** Saliva sampling coupled to RT-qPCR and specific antibody detection efficiently  
32 identifies infants and children infected with SARS-CoV-2. This approach is suitable for  
33 surveillance in kindergarten and school settings.

34

35 **Structured abstract**

36 **IMPORTANCE** Adults are being vaccinated against SARS-CoV-2 worldwide, but the  
37 longitudinal protection of these vaccines is uncertain, given the ongoing appearance of  
38 SARS-CoV-2 variants. Children are susceptible to infection, and some studies reported that  
39 they actively transmit the virus even when asymptomatic, thus affecting the community.  
40 Methods to easily test infected children and track the virus they carry are in demand.

41 **OBJECTIVE** To determine if saliva is an effective sample for detecting SARS-CoV-2 RNA  
42 and antibodies in children aged 10 years and under, and associate viral RNA levels to  
43 infectivity.

44 **DESIGN, SETTING, AND PARTICIPANTS** In this cross-sectional study, saliva SARS-  
45 CoV-2 RT-qPCR tests, with and without RNA extraction, were validated in 49 hospitalized  
46 adults. The test was then applied to 85 children, aged 10 years and under, admitted to the  
47 hospital regardless of COVID-19 symptomatology. Amongst 85 children, 29 (63.0%)  
48 presented at least one COVID-19 symptom, 46 (54.1%) were positive for SARS-CoV-2  
49 infection, 28 (32.9%) were under the age of 1 and the mean (SD) age was 3.8 (3.4) years.  
50 Saliva samples were collected up to 48 h after a positive test by nasopharyngeal (NP) swab-  
51 RT-qPCR.

52 **EXPOSURE** Infection by SARS-COV-2 in adults up to 8 days post-symptom onset. Children  
53 admitted to hospital for any reason and therefore with unclear onset of SARS-CoV-2  
54 infection.

55 **MAIN OUTCOMES AND MEASURES** Saliva RT-qPCR up to CT<37 accurately identifies  
56 SARS-CoV-2 infected children, with viral infectivity in tissue culture restricted to CT<26.

57 **RESULTS** In adults, the accuracy of the saliva SARS-CoV-2 RT-qPCR test was 98.0% (95%  
58 confidence intervals [CI]: 89.3%–100%) as compared to NP-RT-qPCR. In children, the  
59 sensitivity, specificity, and accuracy of saliva-RT-qPCR tests compared to NP swab-RT-

60 qPCR were, respectively, 84.8% (71.8%–92.4%), 100% (91.0%–100%), and 91.8% (84.0%–  
61 96.6%) with RNA extraction and 81.8% (68.0%–90.5%), 100% (91.0%–100%), and 90.4%  
62 (82.1%–95.0%) without RNA extraction. The threshold for rescuing infectious particles from  
63 saliva was  $CT < 26$ . There were significant IgM positive responses to the spike protein and its  
64 receptor-binding domain (RBD) among children positive for SARS-CoV-2 by NP swab and  
65 negative by saliva compared to other groups, indicating late infection onset (>7–10 days).

66 **CONCLUSIONS AND RELEVANCE** Saliva-molecular testing is suitable in children aged  
67 10 years and under, including infants aged <1 year, even bypassing RNA extraction methods.  
68 Importantly, the detected viral RNA levels were significantly above the infectivity threshold  
69 in several samples. Further investigation is required to understand how SARS-CoV-2 RNA  
70 levels correlate with viral transmission.

71

72 **Introduction**

73 The COVID-19 pandemic caused by SARS-CoV-2 has resulted in excess morbidity and  
74 mortality worldwide, especially in elderly populations and people with associated specific  
75 comorbidities.<sup>1-3</sup> Adults and children above 12 years of age are being vaccinated at different  
76 paces worldwide,<sup>4</sup> but younger children will remain more susceptible to infection. How new  
77 variants will be transmitted amongst children and affect the community remains unclear. In  
78 fact, thus far, the role of children in SARS-CoV-2 transmission remains poorly understood,  
79 mostly because the majority of children with SARS-CoV-2 display mild to no symptoms;<sup>5</sup> it  
80 has been estimated that 93% of infected children are not identified by symptom screening.<sup>6</sup>  
81 However, it is now well established that children are susceptible to infection,<sup>7-9</sup> and a small  
82 percentage may develop serious complications,<sup>10</sup> including pneumonia, myocarditis, central  
83 nervous system disorders, and multisystem inflammatory syndrome.<sup>11,12</sup> It is critical in the  
84 next phase of the pandemic, to have readily available strategies for minimally-invasive  
85 approaches to monitor school settings; these strategies could help establish whether children  
86 are prone to evolve new variants and how variants impact viral transmission by children to  
87 the community by combining diagnosis with genotyping and epidemiological analyses.  
88 Saliva molecular testing has emerged as a suitable alternative to nasopharyngeal (NP) swabs  
89 for sampling and identification of SARS-CoV-2 RNA in children and adults, and for  
90 genotyping SARS-CoV-2 variants.<sup>13-15</sup> Compared to NP swabs, saliva testing is less invasive  
91 and may be implemented in self-collected or parent-assisted contexts more easily, including  
92 the sampling of children up to 1-year-old, by low-pressure aspiration. Saliva RT-qPCR  
93 testing is also more sensitive than antigen testing.<sup>16</sup> However, there is still some resistance to  
94 using saliva molecular testing partly because it is not a fast test, and it is unclear if the  
95 detected viral loads are substantially lower than those detected in fast lateral-flow tests using  
96 NP swab samples. In this cross-sectional study, we focused on children aged 10 years and

97 under, admitted to hospital with COVID-19 related symptoms or with unrelated medical  
98 pathologies or surgeries, and investigated the potential of saliva for being coupled to RT-PCR  
99 testing, with saliva collected up to 48 h from a positive (or control) NP swab. Interestingly,  
100 we found non-significant differences between methods using and bypassing RNA extraction.  
101 In addition, we associated RNA levels detected in saliva with infectivity and quantified  
102 specific SARS-CoV-2 spike and receptor-binding-domain (RBD) antibodies in this type of  
103 sample. Interestingly, we only found statistically significant differences in IgM levels in  
104 samples positive in swab-molecular testing that were negative by saliva-molecular testing,  
105 suggesting that discrepancies between saliva and NP molecular tests are more frequent in  
106 children infected for more than 7-10 days, which correlates to loss of infectivity and hence  
107 transmission. Our study shows that saliva molecular testing bypassing RNA extraction is an  
108 efficient method for monitoring SARS-CoV-2 infected children in age groups up to 10 years-  
109 old.

110

111

112 **Methods**

113 **Study design**

114 A total of 49 adults and 85 children (aged 10 years and under) inpatients were enrolled in this  
115 study between 25 August 2020 and 20 June 2021. NP swab samples were collected and  
116 processed at the hospital. Saliva samples were collected from adults or children, within 24 or  
117 48 h from NP swab collection, respectively. Both SARS-CoV-2 positive and negative  
118 individuals (by NP swab) were enrolled in this study. In adults, only symptomatic patients  
119 were enrolled, whereas, for children, patients were enrolled after admission to the hospital for  
120 COVID-19 symptoms or causes non-related to COVID-19 (other medical pathologies or  
121 surgeries).

122 This study was approved by the Ethics committees of Centro Hospitalar Universitário de  
123 Lisboa Central and Hospital Professor Doutor Fernando Fonseca, in compliance with the  
124 Declaration of Helsinki, and follows international and national guidelines for health data  
125 protection. All participants, or their guardians, provided informed written consent to take part  
126 in the study.

127

128 **Saliva collection**

129 At least 1 mL of saliva was collected with the help of a health care worker, after abstinence  
130 from food or water for at least 30 min. Participants were asked to pool saliva in the mouth  
131 and gently spit it into a sterile container without coughing or clearing their throats. For  
132 children under the age of 1 year, saliva was gently aspirated from the mouth with a suction  
133 tube. Samples were stored at 4°C, sent to Instituto Gulbenkian de Ciência, and processed  
134 within 72 h from collection.

135

136 **SARS-CoV-2 detection**

137 Saliva was treated with Proteinase K (645 µg/mL in 160 nM SDS) for 30 min at 50°C,  
138 followed by heat inactivation for 10 min at 98°C. Saliva specimens with high viscosity were  
139 diluted 1:2 in TBE 2x prior to Proteinase K treatment.<sup>17</sup> Samples were then used directly in  
140 the RT-qPCR reaction or after RNA extraction with the QIAamp Viral RNA Mini kit  
141 (Qiagen, 52906), according to the manufacturer's instructions; 200 µL saliva were extracted  
142 and eluted in 50 µL RNase-free water; 1 µL extracted RNA or unextracted saliva were used  
143 for RT-qPCR. A one-step assay (cDNA synthesis and amplification) was performed using  
144 iTaq Universal Probes One-Step Kit (BioRad, #12013250). A master mix was prepared for  
145 each set of primer-probe CDC\_N1, CDC\_N2 and Hs\_RPP30 using: 0.5 nM of each primer  
146 pair, 125 nM of probe, 1x iTaq Universal Probes reaction mix, 2.5% (V/V) iScript Reverse  
147 Transcriptase and 10% (V/V) RNA or unextracted saliva sample. Two positive controls were  
148 performed separately per experiment (SARS-CoV-2 and Human) for N1, N2, and RP primer-  
149 probe set using 2,000 synthetic copies of nucleocapsid region of the virus or 2,000 synthetic  
150 copies of the Human single copy RPP30 gene. One negative control was performed without  
151 template for the same three conditions (N1, N2 and RP). All the primers and probes (2019-  
152 nCoV RUO Kit, 500 rxn, #10006713) were purchased from Integrated DNA Technologies, as  
153 well as the positive virus detection control (2019-nCoV\_N\_Positive Control, #10006625) and  
154 positive human sample control (Hs\_RPP30 Positive Control, #10006626). Reactions were  
155 performed in 384 wells plates (ThermoFisher, #TF-0384) in a QuantStudio 7 Flex system  
156 (Applied Biosciences), using the fast mode, consisting of a hold stage at 50°C for 10 min, and  
157 95°C for 3 min, followed by 45 cycles of a PCR stage at 95°C for 10 sec then 60°C for 30 sec  
158 (FAM signal acquisition step). Positive cases were considered when the two probes were  
159 amplified with a CT below 37. Negative detection was established as having no amplification  
160 or amplification of one probe above 37. Inconclusive results were considered, with only one  
161 probe being amplified with a CT less than 37. The limit of detection (LOD) of the saliva



162 assay was performed by serial dilution of IDT synthetic copies (20,000 to 20) of SARS-CoV-  
163 2 in fresh saliva samples (non-positives) (eFigure 1).

164

#### 165 Infectious SARS-CoV-2 growth from saliva

166 Saliva samples were diluted 1:4 in virus growth medium (Dulbecco's Modified Eagle  
167 Medium [DMEM, Gibco, #21969035] supplemented with 2% fetal bovine serum [FBS,  
168 Gibco, #10500064], 2 mM L-glutamine [ThermoFisher, #25030024], 1%  
169 penicillin/streptomycin solution [Biowest, #L0022] and 2.5 µg/mL Amphotericin B [Gibco,  
170 #15290018]), vortexed, briefly centrifuged to collect debris and passed through a 40 µm  
171 filter. Two hundred µL of each sample were added in triplicate to Vero E6 cells (a kind gift  
172 from Rupert Beale, The Francis Crick Institute, UK) pre-seeded in 24 well plates with  
173 coverslips and centrifuged for 15 min at 3,500 g, 37°C. After centrifugation, the inoculum  
174 was removed and 250 µL of fresh virus growth media were added to the cells (protocol  
175 adapted from <sup>18</sup>). As a positive control, cells were infected with SARS-CoV-2 viral stock  
176 (strain human/DEU/HH-1/2020 from the European Virus Archive Global) at a multiplicity of  
177 infection (MOI) of 0.01. Cells were inspected daily for cytopathic effect (CPE) and  
178 considered negative if no CPE was visible for 7 days. At 1- and 4-days post-infection, a  
179 replicate was fixed with 4% formaldehyde and processed for immunofluorescence, as  
180 described in <sup>19</sup>. Cells were stained with a rabbit polyclonal SARS-CoV-2 nucleocapsid  
181 antibody (1:1,000; ThermoFisher, #MA536270) and an anti-rabbit IgG Alexa-Fluor 488  
182 secondary antibody (1:1,000; Invitrogen, #A-21206). Cell nuclei were stained with Hoechst  
183 33342 (1 µg/mL, Invitrogen, #H3570). Single optical sections were imaged with a Leica SP5  
184 confocal microscope.

185

#### 186 ELISA

187 The ELISA assay used to quantify saliva IgG, IgA, and IgM anti-full-length SARS-CoV-2  
188 spike and its receptor-binding domain (RBD) was adapted from <sup>20</sup> as described in <sup>21,22</sup>, with  
189 few modifications described here. Briefly, high binding 96-well plates (Maxisorb) were  
190 coated with either RBD or spike as capture antigen at 0.5 µg/mL stored overnight at 4°C.  
191 Plates were blocked with PBS supplemented with 2% BSA (PBS-BSA) for 1–4 hours at  
192 room temperature. Saliva samples were tested at 1 in 25 dilutions in PBS with 2% BSA and  
193 0.1% Tween (PBS-BSA-T), in duplicate. For each isotype test plate, an IgG, IgM (GenScript  
194 [clone 2001]) or IgA (Absolute Antibody [clone 3022]) SARS-CoV-2 reactive monoclonal  
195 antibody was used to generate a concentration curve upon serial dilution and validate each  
196 plate assayed. Duplicate measurements of reference positive and negative sera samples were  
197 used at 1 in 50 dilutions in PBS-BSA-T to validate each plate assayed; negative sera were  
198 used to determine cutoff values.

199 Samples and monoclonal antibodies were incubated for 2 hours at 37°C, then plates were  
200 washed 3x in PBS-T. Secondary antibody goat anti-Human Fc-HRP IgG, IgA or IgM  
201 (Abcam) diluted 1 in 25,000 in PBS-BSA-T was added to respective isotype plates and  
202 incubated for 1 hour at 37°C to reveal bound IgG, IgA or IgM. Plates were then washed 3x in  
203 PBS-T and incubated with 3,3',5,5'-tetramethylbenzidine (BD OptEIA™, BD Biosciences)  
204 for 20 to 30 minutes at 37°C. The reaction was stopped with sulphuric acid, and the  
205 colorimetric assay was read to provide optical density (OD) at 450 nm.

206 Reference negative sera were collected at least 3 years before the COVID-19 pandemic and  
207 used as pooled serum from 50 samples. Isotype-specific positive and negative thresholds  
208 were determined for each assay plate from the mean negative serum value plus two standard  
209 deviations (SD). Negative sera were obtained upon informed consent in the frame of the  
210 projects “Genetic susceptibility factors and immunologic protection in COVID-19” and

211 “Genetic variance in Portuguese population: candidate genes in COVID-19”, both approved  
212 by the IGC Ethics Committee (reference H004.2020 and H002.2020, respectively).

213

#### 214 Statistical analysis

215 The values of sensitivity, specificity, and accuracy were estimated using the results of the NP  
216 swab as the reference standard. 95% confidence intervals (CI) were calculated using the  
217 Wilson method, recommended for small sample sizes.<sup>23</sup> The analytical sensitivity of SARS-  
218 CoV-2 RNA detection between saliva and nasopharyngeal swabs from SARS-CoV-2 positive  
219 adults and children was compared using a Wilcoxon matched-pairs signed-rank test, in  
220 GraphPad Prism 9.1.2.

221 ELISA data were cleaned, and categorical variables were created where needed. Thresholds  
222 for antibody-positive responses were defined by the negative pool (mean + 2 SD). The  
223 correlation between antibody OD values and age was assessed using Pearson’s Pairwise  
224 coefficients. Descriptive statistics were assessed as frequencies and percentages (n [%]) for  
225 categorical variables; crude associations were tested with Pearson’s Chi2 tests. Significance  
226 level was set at <0.05. STATA (StataCorp LLC, USA, V16) was used for all analyses.

227

228 **Results**

229 **Method validation in adults**

230 We first validated our method with adult patients admitted to Hospital Fernando Fonseca  
231 with COVID-19, or without SARS-CoV-2 infection, as negative controls. Once SARS-CoV-  
232 2 infection was assessed by RT-qPCR on RNA extracted from a nasopharyngeal (NP) swab,  
233 a saliva sample was collected within the following 48 hours. Saliva specimens were pre-  
234 treated with proteinase K, RNA was extracted and subjected to RT-qPCR using the primer  
235 and probe sequences from the Center for Disease Control and Prevention.<sup>24</sup> Alternatively,  
236 saliva samples treated with proteinase K were used directly for the RT-qPCR reaction,  
237 without RNA extraction.

238 The overall concordances of saliva and NP swab were 98.0% (48/49) and 97.8% (46/47),  
239 with and without RNA extraction from saliva, respectively (Table 1). Of the patients with a  
240 positive NP swab, 100% were also positive in saliva, either with (36/36) or without (34/34)  
241 RNA extraction. The differences in CT values between saliva (with or without RNA  
242 extraction) and NP swab were not statistically significant (Figure 1A), but CT values in saliva  
243 with vs. without RNA extraction are statistically different, with extraction of RNA  
244 consistently decreasing the CT values obtained.

245 Next, we analyzed the stability of saliva samples for stored 3 days at 4°C or 7 days at -20°C  
246 prior to processing (Figure 1B). We detected viral RNA in all saliva samples kept at 4°C and  
247 -20°C, regardless of RNA extraction, demonstrating they are stable under the conditions  
248 studied.

249

250 **Performance of the method in pediatric patients**

251 Eighty-five patients aged 10 years and under admitted to Hospital Dona Estefânia between  
252 August 2020 and June 2021 were included in our analysis. The clinical characteristics of the

253 participants are shown in Table 2. Forty-six (54.1%) were positive for SARS-CoV-2 infection  
254 and, within these, 29 (63.0%) presented at least one COVID-19 symptom, the most common  
255 being fever (50.0%), cough (28.0%), and coryza (28.0%). The remaining 17 children (37.0%)  
256 were diagnosed on routine tests prior to hospital admission for causes non-related to COVID-  
257 19. Twenty-eight (32.9%) participants were under the age of 1 and the mean (SD) age was  
258 3.8 (3.4) years.

259 Upon hospital admission, SARS-CoV-2 infection was assessed by RT-qPCR quantification  
260 of RNA load in NP swab samples. Saliva samples were collected within the following 48  
261 hours and processed as described above. The overall concordances of saliva and NP swab  
262 were 91.8% (78/85) with RNA extraction and 90.4% (75/83) without RNA extraction from  
263 saliva (Table 1). Of the children with a positive NP swab, 84.8% were positive in saliva after  
264 RNA extraction (39/46) and 81.1% (36/44) were positive in saliva without RNA extraction.  
265 The specificity of the method was 100%, with the 39 patients negative by NP swab, also  
266 negative in saliva, with and without RNA extraction. When restricting the analysis to children  
267 younger than 1-year-old, the sensitivity of the method increases to 87.0% (25/28) with RNA  
268 extraction and 86.4% (19/27) without RNA extraction from saliva (Table 1).

269 The CT values in the saliva of children were significantly different from those in NP swab  
270 (Figure 2A), with a mean CT (SD) of 22.9 (6.2) in NP swab versus 26.1 (5.1) in saliva with  
271 RNA extraction and 27.9 (4.7) without extraction. It is important to notice that there was a  
272 time interval between NP swab and saliva collection that could go up to 48 h and, therefore,  
273 these differences may not reflect a lower sensitivity of our method but rather a decrease in the  
274 patient viral load. Importantly, there was no correlation between detection of SARS-CoV-2 in  
275 saliva and the CT value of the NP swab, or the age of the patient (Figure 2B).

276 We also analyzed the stability of saliva samples from children when stored for 3 days at 4°C  
277 or 7 days at -20°C prior to processing (Figure 2C). As for adults, saliva samples from children

278 were stable under the conditions tested, since viral RNA was detectable in all samples,  
279 irrespective of whether RNA extraction was performed.

280 Finally, we tested saliva samples on a commercial lateral-flow test (COVID19 antigen rapid  
281 test, ALL TEST, #ICOV-502). Saliva samples that tested positive in our molecular assay with  
282  $CT < 26$  also tested positive in the chosen lateral-flow assay (eFigure 2). Of note, two other  
283 commercial lateral-flow tests performed poorly in our hands. These data are consistent with  
284 what was observed for NP swabs<sup>16</sup> and may have direct implications for monitoring schools.

285

### 286 Viral growth from saliva samples

287 To address if we could detect infectious SARS-CoV-2 viruses in children saliva and correlate  
288 viral replication with their CT value, saliva samples were cultured in Vero cells, inspected  
289 daily for CPE, and analyzed by immunofluorescence using an antibody against SARS-CoV-2  
290 nucleoprotein (Figure 2D). Importantly, we recovered infectious viruses from all saliva  
291 samples with CT values  $\leq 25.6$ , whereas in saliva samples with higher CT values or negative,  
292 no viral replication was detected. These results suggest that children with CT values in saliva  
293 equal or higher than 26 may not be able to shed infectious viruses.

294

### 295 Antibodies against SARS-CoV-2 in saliva

296 To address the levels of anti-SARS-CoV-2 IgG, IgA and IgM antibodies in the saliva of  
297 adults and children, we performed ELISA assays against full-length spike and spike's RBD  
298 (Figure 2F and Table 3). In adults, all saliva samples (n=21) tested negative for IgG  
299 reactivities. In contrast, reactive IgA was detected in 16 (76.2%) adults, regardless of NP  
300 swab and saliva results, suggesting that the detection of IgA antibodies does not correlate  
301 with infection. This discrepancy could, however, be explained by the presence of secreted

302 IgAs (sIgAs) that recognize glycosylation patterns existent in spike.<sup>25,26</sup> Only one (4.8%)  
303 participant was positive for reactive IgM.

304 Of the 73 saliva samples from children tested by ELISA, 3 (3.1%) were positive for specific  
305 IgG. Reactive IgA and IgM were detected in 44 (60.3%) and 5 (11.1%) participants,  
306 respectively. Four participants with discrepant NP vs. saliva RT-qPCR data (NP positive,  
307 saliva negative, n=12) presented IgM, suggesting that the corresponding samples were  
308 collected after the first immune response, estimated to be 7-10 days post-infection, and  
309 therefore after the peak of viral loads.

310 For children up to 10 years, IgG OD responses increased significantly ( $p < 0.05$ ) with age for  
311 spike, while IgA OD responses to spike and RBD presented a marginally significant ( $p < 0.1$ )  
312 increase with age (Figure 2F).

313

314

## 315 **Discussion**

316 The infection of SARS-CoV-2 in children remains under-diagnosed and poorly understood.  
317 In particular, the role of children in viral transmission remains unclear, especially with the  
318 emerging variants that increase viral transmission, such as the delta variant. In our work, we  
319 corroborate findings that saliva molecular testing by methods similar to those described  
320 previously<sup>15</sup> efficiently detects infected children, even in children unable to donate saliva  
321 (Figure 2A), for whom saliva was gently aspirated. Importantly, in children, the sensitivity,  
322 specificity, and accuracy of saliva-RT-qPCR tests compared to NP swab-RT-qPCR were  
323 respectively 84.8% (71.8%–92.4%), 100% (91.0%–100%), and 91.8% (84.0%–96.6%) with  
324 RNA extraction and 81.8% (68.0%–90.5%), 100% (91.0%–100%), and 90.4% (82.1%–  
325 95.0%) without RNA extraction. Hence, we show that methods bypassing RNA extraction  
326 have a sensitivity of 97.3% (36/37) compared with assays extracting RNA, and 100% (36/36)  
327 sensitivity considering CTs up to 36 with RNA extraction. We observed that discrepancies  
328 between saliva and NP swab-based molecular tests were found in children with specific IgM  
329 responses, which could suggest lower viral loads and prolonged infection. Interestingly, our  
330 study detected a high proportion of uninfected children with IgA antibodies in saliva.  
331 Antibodies in saliva may be acquired from the blood via the gingival crevicular fluid.<sup>27</sup>  
332 However, there is a portion of IgAs that are produced locally in mucosal tissues, such as  
333 salivary glands, including secretory IgA (sIgA).<sup>25</sup> While some sIgA antibodies undergo  
334 affinity maturation, others recognize specific glycosylation patterns<sup>26</sup> and could justify the  
335 high levels detected in negative patients. This cross-reactive response has been reported by  
336 others in the mucosal tissue<sup>28,29</sup> and is considered an important property of sIgAs for  
337 protecting the mucosal tissue against infections.

338 In addition, our study shows that SARS-CoV-2 infectious viruses may be rescued from saliva  
339 samples with CTs lower than 26 (Figure 2D, E). Data suggest that high viral loads are prone



340 to result in viral transmission.<sup>18</sup> In our study, SARS-CoV-2 viral growth was not associated  
341 with symptoms in children, but the sample size used was too low to draw conclusions  
342 regarding how symptoms relate to viral loads. In fact, it has been shown that asymptomatic  
343 children have significantly lower viral loads than symptomatic children.<sup>7</sup> Overall, it is well-  
344 established that infected children are more likely to remain asymptomatic or have milder  
345 disease than adults; children are rarely hospitalized and rarely have fatal outcomes.<sup>1,6,9,10,30</sup>  
346 However, data accumulated from 22 centers throughout South Korea has shown that 58% of  
347 symptomatic infected children experienced symptoms 3 days (median, in a range of 1-28  
348 days) before SARS-CoV-2-positive diagnostic and that, despite having a detectable virus  
349 load, pre-symptomatic children remained symptom-free for 2.5 days (median, in a range of 1-  
350 25 days).<sup>6</sup> For these reasons, the vast majority of SARS-CoV-2 infected children will  
351 continue to be missed by a symptom-based testing approach.<sup>6</sup> With the unprecedented effort  
352 of vaccinating the world population above 12-years-old, it is critical to understand how  
353 children below 12-years-old contribute to viral circulation within their community. To this  
354 need, it is essential to implement efficient, easy, non-invasive, cheap methods for accurately  
355 identifying and tracking infected children, for which our method offers a solution. It is also  
356 critical to establish if children are a potential source for emerging novel SARS-CoV-2  
357 variants, and saliva is suitable for collecting SARS-CoV-2 for genotyping<sup>13-15</sup> and detecting  
358 antibodies specific to spike and RBD as we show here (Figure 2F and Table 3). How  
359 infection in children will impact breakthrough infections upon vaccination, which has been  
360 demonstrated as possible,<sup>31</sup> remains to be elucidated and is of the utmost importance. Overall,  
361 our study provides a method highly suitable to identify children positive for SARS-CoV-2. It  
362 could be used for the surveillance of kindergartens and schools, and also as the first step in  
363 genotyping efforts to monitor known variants and spot novel ones when coupled to CRISPR-  
364 based methodologies.<sup>32</sup>



366 **Limitations**

367 This cross-sectional study has one key limitation. There was an interval of up to 48 hours  
368 between SARS-CoV-2 infection diagnostic in children by NP swab and the collection of a  
369 saliva sample. Given this time interval, it remains unclear whether the saliva molecular  
370 testing has a lower sensitivity than the NP test, or whether there was a real decrease in the  
371 patient viral load between the two samples collection. In support of the former scenario, other  
372 studies conducted in adults reported a small detection decrease in saliva relative to NP  
373 swabs.<sup>15,33-37</sup> Despite the temporal limitation, our saliva testing in children up to 10-years-old  
374 indicates a high sensitivity, specificity, and accuracy with and without RNA extraction,  
375 showing that the method is suitable for detecting infected children. An important note is that  
376 children were admitted to hospital for many reasons other than COVID-19 related symptoms  
377 and hence this study is suitable to draw conclusions for children regardless of their  
378 symptoms. A second limitation of this study is that the number of samples from which we  
379 rescued infective viral particles in cultured cells does not allow a suitable statistical analysis  
380 to relate viral loads with symptoms and is not a formal demonstration of transmission from  
381 children. A third caveat is that the ELISA assay, despite being specific for sera and collected  
382 from infected people,<sup>21</sup> was not established for saliva. In fact, we did not calibrate the ELISA  
383 with pre-pandemic saliva, and as children were not re-analyzed posteriorly for antibody  
384 development, there is a lack of saliva positive and negative controls, which also limits the  
385 conclusions we may draw from the data.

386

387

388 **References**

- 389 1. Guan WJ, Ni ZY, Hu Y, et al. Clinical Characteristics of Coronavirus Disease 2019 in  
390 China. *N Engl J Med.* 2020;382(18):1708-1720.
- 391 2. Yang J, Zheng Y, Gou X, et al. Prevalence of comorbidities and its effects in patients  
392 infected with SARS-CoV-2: a systematic review and meta-analysis. *Int J Infect Dis.*  
393 2020;94:91-95.
- 394 3. Wang D, Hu B, Hu C, et al. Clinical Characteristics of 138 Hospitalized Patients With  
395 2019 Novel Coronavirus-Infected Pneumonia in Wuhan, China. *JAMA.*  
396 2020;323(11):1061-1069.
- 397 4. Ledford H. Should children get COVID vaccines? What the science says. *Nature.*  
398 2021;595:638-639
- 399 5. Jones TC, Biele G, Muhlemann B, et al. Estimating infectiousness throughout SARS-  
400 CoV-2 infection course. *Science.* 2021;373(6551).
- 401 6. Han MS, Choi EH, Chang SH, et al. Clinical Characteristics and Viral RNA Detection in  
402 Children With Coronavirus Disease 2019 in the Republic of Korea. *JAMA Pediatr.*  
403 2021;175(1):73-80.
- 404 7. Kam KQ, Thoon KC, Maiwald M, et al. SARS-CoV-2 viral RNA load dynamics in the  
405 nasopharynx of infected children. *Epidemiol Infect.* 2021;149:e18.
- 406 8. Jones TC, Mühlemann B, Hofmann J, et al. An analysis of SARS-CoV-2 viral load by  
407 patient age. 2020.
- 408 9. Lu X, Zhang L, Du H, et al. SARS-CoV-2 Infection in Children. *N Engl J Med.*  
409 2020;382(17):1663-1665.
- 410 10. Chao JY, Derespina KR, Herold BC, et al. Clinical Characteristics and Outcomes of  
411 Hospitalized and Critically Ill Children and Adolescents with Coronavirus Disease 2019  
412 at a Tertiary Care Medical Center in New York City. *J Pediatr.* 2020;223:14-19 e12.

- 413 11. Mardi P, Esmaeili M, Iravani P, Abdar ME, Pourrostami K, Qorbani M. Characteristics  
414 of Children With Kawasaki Disease-Like Signs in COVID-19 Pandemic: A Systematic  
415 Review. *Front Pediatr.* 2021;9:625377.
- 416 12. Ebina-Shibuya R, Namkoong H, Shibuya Y, Horita N. Multisystem Inflammatory  
417 Syndrome in Children (MIS-C) with COVID-19: Insights from simultaneous familial  
418 Kawasaki Disease cases. *Int J Infect Dis.* 2020;97:371-373.
- 419 13. Carmagnola D, Pellegrini G, Canciani E, et al. Saliva Molecular Testing for SARS-CoV-  
420 2 Surveillance in Two Italian Primary Schools. *Children (Basel).* 2021;8(7).
- 421 14. Jayamohan H, Lambert CJ, Sant HJ, et al. SARS-CoV-2 pandemic: a review of  
422 molecular diagnostic tools including sample collection and commercial response with  
423 associated advantages and limitations. *Anal Bioanal Chem.* 2021;413(1):49-71.
- 424 15. Wyllie AL, Fournier J, Casanovas-Massana A, et al. Saliva is more sensitive for SARS-  
425 CoV-2 detection in COVID-19 patients than nasopharyngeal swabs. *medRxiv.*  
426 2020;<https://doi.org/10.1101/2020.04.16.20067835>
- 427 16. Schildgen V, Demuth S, Lusebrink J, Schildgen O. Limits and Opportunities of SARS-  
428 CoV-2 Antigen Rapid Tests: An Experienced-Based Perspective. *Pathogens.* 2021;10(1).
- 429 17. Ranoa DRE, Holland RL, Alnaji FG, et al. Saliva-Based Molecular Testing for SARS-  
430 CoV-2 that Bypasses RNA Extraction. *bioRxiv.*  
431 2020;<https://doi.org/10.1101/2020.06.18.159434> .
- 432 18. van Kampen JJA, van de Vijver D, Fraaij PLA, et al. Duration and key determinants of  
433 infectious virus shedding in hospitalized patients with coronavirus disease-2019  
434 (COVID-19). *Nat Commun.* 2021;12(1):267.
- 435 19. Vale-Costa S, Alenquer M, Sousa AL, et al. Influenza A virus ribonucleoproteins  
436 modulate host recycling by competing with Rab11 effectors. *J Cell Sci.*  
437 2016;129(8):1697-1710.

- 438 20. Stadlbauer D, Amanat F, Chromikova V, et al. SARS-CoV-2 Seroconversion in Humans:  
439 A Detailed Protocol for a Serological Assay, Antigen Production, and Test Setup. *Curr*  
440 *Protoc Microbiol.* 2020;57(1):e100-e100.
- 441 21. Alenquer M, Ferreira F, Lousa D, et al. Amino acids 484 and 494 of SARS-CoV-2 spike  
442 are hotspots of immune evasion affecting antibody but not ACE2 binding. *bioRxiv.*  
443 2021:2021.2004.2022.441007.
- 444 22. Viana JF, Bergman M-L, Gonçalves LA, et al. Population homogeneity for the antibody  
445 response to COVID-19 BNT162b2 / Comirnaty vaccine is only reached after the second  
446 dose, across all adult age ranges. *MedRxiv.* 2021;2021.03.19.21253680.
- 447 23. Newcombe RG. Improved confidence intervals for the difference between binomial  
448 proportions based on paired data. *Stat Med.* 1998;17(22):2635-2650.
- 449 24. Centers for Disease Control and Prevention USDoHaHS. Research Use Only 2019-  
450 Novel Coronavirus (2019-nCoV) Real-time RT-PCR Primers and Probes. 2020.
- 451 25. Stadtmueller BM, Huey-Tubman KE, Lopez CJ, Yang Z, Hubbell WL, Bjorkman PJ.  
452 The structure and dynamics of secretory component and its interactions with polymeric  
453 immunoglobulins. *Elife.* 2016;5.
- 454 26. Gonçalves J, Juliano AM, Charepe N, et al. Non-neutralizing secretory IgA and T cells  
455 targeting SARS-CoV-2 spike protein are transferred to the breastmilk upon BNT162b2  
456 vaccination. *medRxiv.* 2021:2021.2005.2003.21256416.
- 457 27. Ebersole JL. Humoral immune responses in gingival crevice fluid: local and systemic  
458 implications. *Periodontol 2000.* 2003;31:135-166.
- 459 28. Woof JM, Mestecky J. Mucosal immunoglobulins. *Immunological Reviews.*  
460 2005;206(1):64-82.
- 461 29. Brandtzaeg P. Induction of secretory immunity and memory at mucosal surfaces.  
462 *Vaccine.* 2007;25(30):5467-5484.

- 463 30. Hoang A, Chorath K, Moreira A, et al. COVID-19 in 7780 pediatric patients: A  
464 systematic review. *EClinicalMedicine*. 2020.
- 465 31. Hacısuleyman E, Hale C, Saito Y, et al. Vaccine Breakthrough Infections with SARS-  
466 CoV-2 Variants. *N Engl J Med*. 2021;384(23):2212-2218.
- 467 32. de Puig H, Lee RA, Najjar D, et al. Minimally instrumented SHERLOCK  
468 (miSHERLOCK) for CRISPR-based point-of-care diagnosis of SARS-CoV-2 and  
469 emerging variants. *Science Advances*. 2021;7(32):eabh2944.
- 470 33. Chua GT, Wong JSC, To KKW, et al. Saliva viral load better correlates with clinical and  
471 immunological profiles in children with coronavirus disease 2019. *Emerg Microbes*  
472 *Infect*. 2021;10(1):235-241.
- 473 34. Khurshid Z, Zohaib S, Joshi C, Moin SF, Zafar MS, Speicher DJ. Saliva as a non-  
474 invasive sample for the detection of SARS-CoV-2: a systematic review. 2020.
- 475 35. Moreno-Contreras J, Espinoza MA, Sandoval-Jaime C, et al. Saliva sampling is an  
476 excellent option to increase the number of SARS CoV2 diagnostic tests in settings with  
477 supply shortages. *bioRxiv*. 2020;<https://doi.org/10.1101/2020.06.24.170324>
- 478 36. Xu R, Cui B, Duan X, Zhang P, Zhou X, Yuan Q. Saliva: potential diagnostic value and  
479 transmission of 2019-nCoV. *Int J Oral Sci*. 2020;12(1):11.
- 480 37. Yee R, Truong TT, Pannaraj PS, et al. Saliva Is a Promising Alternative Specimen for  
481 the Detection of SARS-CoV-2 in Children and Adults. *Journal of Clinical Microbiology*.  
482 2021;59(2):e02686-02620.

483

484

485

486 **Acknowledgements**

487 This publication was supported by the European Virus Archive Global (EVA-GLOBAL)  
488 project that has received funding from the European Union's Horizon 2020 research and  
489 innovation program under grant agreement No 871029. It was funded by the Fundação para a  
490 Ciência and Tecnologia (FCT, Portugal) under RESEARCH4COVID 19 call with reference  
491 283\_596885654 and co-funded by ANI under INOV4COVID (Funding to V.M.B.). M.J.A. is  
492 funded by the FCT (CEECIND/02373/2020). M.A. is funded by a Junior Researcher working  
493 contract from FCT and Instituto Gulbenkian de Ciência (IGC, Portugal). This work benefited  
494 from COVID19 emergency funds 2020 from Calouste Gulbenkian Foundation and from  
495 Oeiras city council.



496 **Figures**

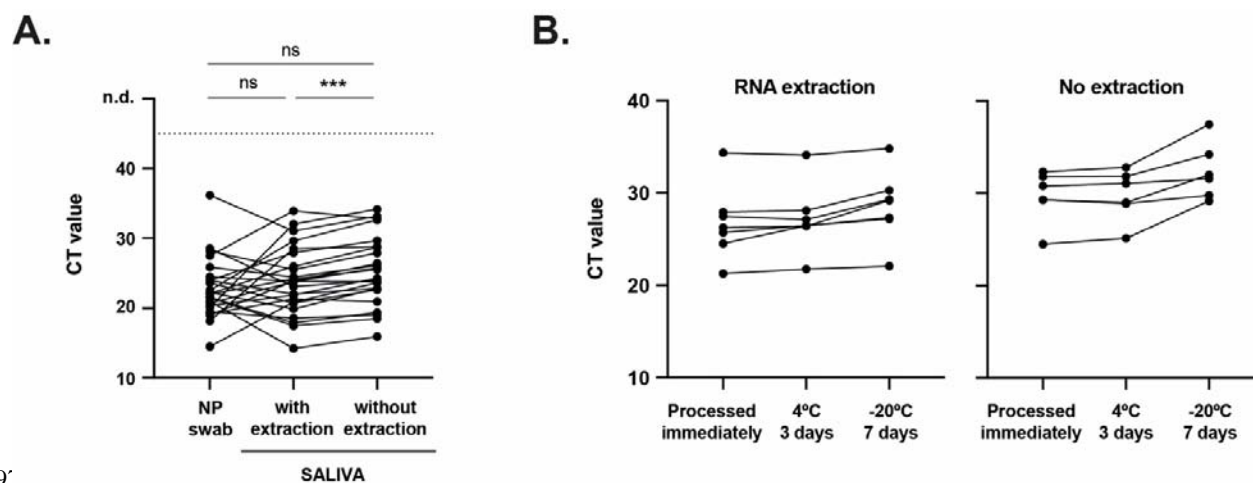

497

498 **Figure 1. SARS-CoV-2 RNA detection in NP swab and saliva samples from adult**  
499 **patients infected with SARS-CoV-2.** (A) Comparison of CT values from paired saliva (with  
500 and without RNA extraction) and NP swab specimens. Each line corresponds to a paired  
501 specimen. n.d., not detected. ns, not significant; \*\*\*p<0.001, by Wilcoxon matched-pairs  
502 signed-rank test. (B) Saliva stability at 4°C and -20°C: comparison of CT values from paired  
503 saliva samples (with and without RNA extraction) processed immediately, after 3 days at 4°C  
504 or 7 days at -20°C.

505

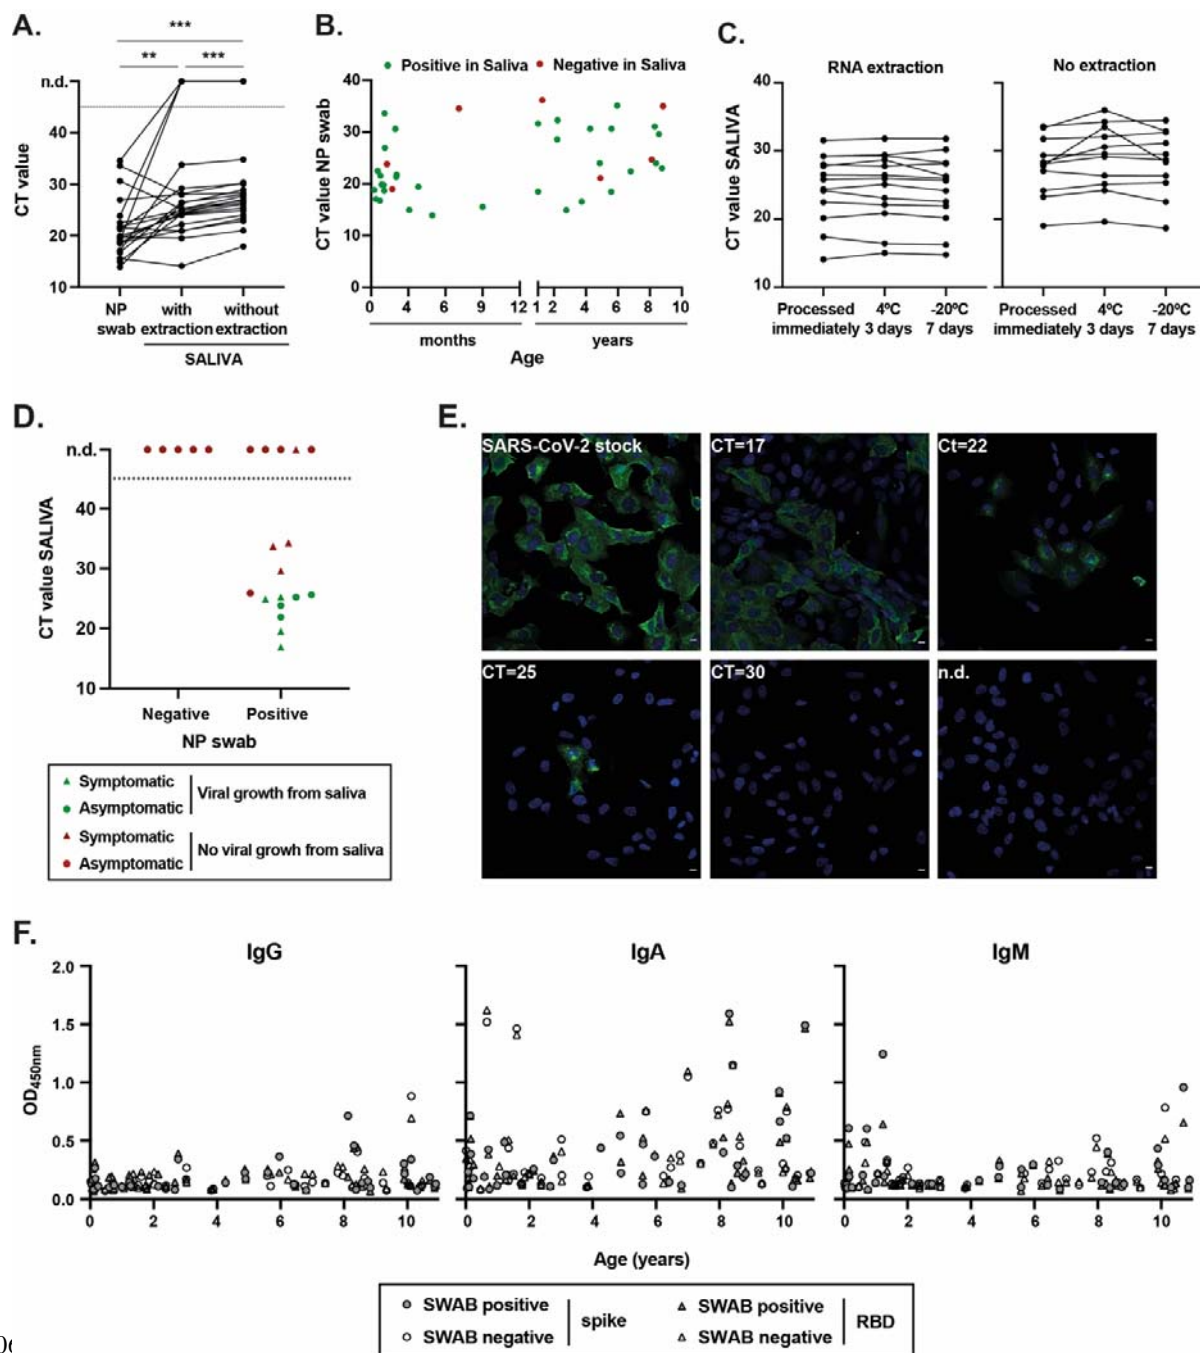

506

507 **Figure 2. Detection of SARS-CoV-2 infection in NP swab and saliva samples from**  
 508 **children.** (A) Comparison of CT values from paired saliva (with and without RNA  
 509 extraction) and NP swab specimens from children aged 10 years and under, positive for  
 510 SARS-CoV-2 infection. Each line corresponds to a paired specimen. n.d., not detected. Each  
 511 line corresponds to a paired specimen. n.d., not detected; \*\*p<0.01, \*\*\*p<0.001, by

512 Wilcoxon matched-pairs signed-rank test. (B) Graphical representation of CT values in NP  
513 swabs from infected children vs. age. Positive in saliva, green dots; negative in saliva, red  
514 dots. (C) Saliva stability at 4°C and -20°C: comparison of CT values from paired saliva  
515 samples (with and without RNA extraction) processed immediately, after 3 days at 4°C or 7  
516 days at -20°C. (D, E) Infectious SARS-CoV-2 growth from saliva samples. Vero E6 cells  
517 were inoculated with saliva samples from children and inspected daily for the presence of a  
518 cytopathic effect. As a positive control, cells were infected with SARS-CoV-2 viral stock at  
519 an MOI of 0.01. (D) Graphical representation of CT values in saliva vs. NP swab result, with  
520 dots representing symptomatic children, triangles asymptomatic patients, green color  
521 indicating samples where viral replication was detected, and red color samples without viral  
522 growth. n.d., non-detected. (E) At 24h post-infection, cells were fixed with 4% formaldehyde,  
523 permeabilized with 0.2% Triton X100, and stained with SARS-CoV-2 Nucleocapsid antibody  
524 (green). Cell nuclei were stained with Hoechst (blue). White bar=10µm. Images were  
525 acquired with a Leica SP5 confocal microscope. Representative images from Vero cells  
526 infected with SARS-CoV-2 viral stock or inoculated with saliva specimens with CT values of  
527 17, 22, 25, and 30, or saliva with non-detected SARS-CoV-2 (n.d.). (F) Levels of IgG, IgA,  
528 and IgM against full-length spike and spike's RBD measured in the saliva of children aged 10  
529 years and under, measured by ELISA.

530

531 **Tables**

532 **Table 1.** Performance of saliva in adults and children. Summary of results obtained from  
 533 parallel testing of swab and saliva with and without extraction of RNA.

| NP swab No.              | Saliva No.          |          |       |                        |          |       |
|--------------------------|---------------------|----------|-------|------------------------|----------|-------|
|                          | with RNA extraction |          |       | without RNA extraction |          |       |
|                          | Positive            | Negative | Total | Positive               | Negative | Total |
| <b>Adults &gt; 18y</b>   |                     |          |       |                        |          |       |
| Positive                 | 36                  | 0        | 36    | 34                     | 0        | 34    |
| Negative                 | 1                   | 12       | 13    | 1                      | 12       | 13    |
| Total                    | 37                  | 12       | 49    | 35                     | 12       | 47    |
| Sensitivity (95%CI)      | 100% (90.4%–100%)   |          |       | 100% (89.8%–100%)      |          |       |
| Specificity (95%CI)      | 92.3% (66.7%–98.6%) |          |       | 92.3% (66.7%–98.6%)    |          |       |
| Accuracy (95%CI)         | 98.0% (89.3%–99.6%) |          |       | 97.9% (88.9%–99.6%)    |          |       |
| <b>Children &lt; 10y</b> |                     |          |       |                        |          |       |
| Positive                 | 39                  | 7        | 46    | 36                     | 8        | 44    |
| Negative                 | 0                   | 39       | 39    | 0                      | 39       | 39    |
| Total                    | 39                  | 46       | 85    | 36                     | 47       | 83    |
| Sensitivity (95%CI)      | 84.8% (71.8%–92.4%) |          |       | 81.8% (68.0%–90.5%)    |          |       |
| Specificity (95%CI)      | 100% (91.0%–100%)   |          |       | 100% (91.0%–100%)      |          |       |
| Accuracy (95%CI)         | 91.8% (84.0%–96.6%) |          |       | 90.4% (82.1%–95.0%)    |          |       |
| <b>Children &lt; 1y</b>  |                     |          |       |                        |          |       |
| Positive                 | 20                  | 3        | 23    | 19                     | 3        | 22    |
| Negative                 | 0                   | 5        | 5     | 0                      | 5        | 5     |
| Total                    | 20                  | 8        | 28    | 19                     | 8        | 27    |
| Sensitivity (95%CI)      | 87.0% (67.9%–95.5%) |          |       | 86.4% (66.7%–95.3%)    |          |       |
| Specificity (95%CI)      | 100% (56.6%–100%)   |          |       | 100% (56.6%–100%)      |          |       |
| Accuracy (95%CI)         | 89.3% (72.8%–96.3%) |          |       | 88.9% (71.9%–96.1%)    |          |       |

534  
 535  
 536

537 **Table 2.** Characteristics and reported signs and symptoms of SARS-CoV-2-positive and  
 538 negative children included in this study.

| Characteristic                  | No. (%)      |           |           |
|---------------------------------|--------------|-----------|-----------|
|                                 | Total sample | Negative  | Positive  |
| <b>Total</b>                    | 85           | 39 (45.9) | 46 (54.1) |
| <b>Sex</b>                      |              |           |           |
| Female                          | 39 (45.9)    | 20 (51.3) | 19 (41.3) |
| Male                            | 46 (54.1)    | 19 (48.7) | 27 (58.7) |
| <b>Age (y)</b>                  |              |           |           |
| <1                              | 28 (32.9)    | 5 (12.8)  | 23 (50)   |
| 1–5                             | 25 (29.4)    | 15 (38.5) | 10 (21.7) |
| 6–10                            | 32 (37.7)    | 19 (48.7) | 13 (28.3) |
| <b>COVID-19 sign or symptom</b> |              |           |           |
| None                            | 17 (37.0)    | NA        | 17 (37.0) |
| Fever                           | 23 (50.0)    | NA        | 23 (50.0) |
| Cough                           | 13 (28.3)    | NA        | 13 (28.3) |
| Dyspnea                         | 5 (10.9)     | NA        | 5 (10.9)  |
| Coryza                          | 13 (28.3)    | NA        | 13 (28.3) |
| Odynophagia                     | 4 (8.7)      | NA        | 4 (8.7)   |
| Headache                        | 1 (2.2)      | NA        | 1 (2.2)   |
| Abdominal pain                  | 1 (2.2)      | NA        | 1 (2.2)   |
| Nausea/Vomit                    | 3 (6.5)      | NA        | 3 (6.5)   |
| Diarrhea                        | 3 (6.5)      | NA        | 3 (6.5)   |
| <b>Concurrent conditions</b>    |              |           |           |
| 0                               | 11 (12.9)    | 1         | 10        |
| 1                               | 69 (81.2)    | 35        | 34        |
| >1                              | 5 (5.9)      | 3         | 2         |
| Another Infection               | 12 (14.1)    | 1         | 11        |
| Cardiovascular disease          | 5 (5.9)      | 0         | 5 (10.9)  |
| Urinary tract disease           | 13 (15.3)    | 6         | 7         |
| Digestive tract disease         | 10 (11.8)    | 5         | 5         |
| Another respiratory disease     | 5 (5.9)      | 0         | 5         |
| Oral surgery                    | 4 (4.7)      | 4         | 0         |
| Facial congenital anomalies     | 3 (3.5)      | 3         | 0         |

539  
 540  
 541

542 **Table 3.** Patients with antibodies in saliva against full-length spike or RBD, divided by age  
 543 category and by RT-qPCR result on swab and saliva.

| Group                          | Total sample No. | Positive No. (%) |                  |                 |                 |                  |                |
|--------------------------------|------------------|------------------|------------------|-----------------|-----------------|------------------|----------------|
|                                |                  | Spike            |                  |                 | RBD             |                  |                |
|                                |                  | IgG              | IgA              | IgM             | IgG             | IgA              | IgM            |
| <b>Adults &gt; 18y</b>         | <b>21</b>        | <b>0</b>         | <b>15 (71.4)</b> | <b>1 (4.8)</b>  | <b>0</b>        | <b>16 (76.2)</b> | <b>1 (4.8)</b> |
| Swab-/saliva-                  | 5                | 0                | 3 (60.0)         | 0               | 0               | 3 (60.0)         | 0              |
| Swab-/saliva+                  | 0                | 0                | 0                | 0               | 0               | 0                | 0              |
| Swab+/saliva-                  | 0                | 0                | 0                | 0               | 0               | 0                | 0              |
| Swab+/saliva+                  | 16               | 0                | 12 (75.0)        | 1(6.3)          | 0               | 13 (81.3)        | 1 (6.2)        |
| <b>Children ≤ 10y</b>          | <b>73</b>        | <b>3 (4.1)</b>   | <b>44 (60.3)</b> | <b>5 (11.1)</b> | <b>1 (1.37)</b> | <b>39 (53.4)</b> | <b>4 (5.5)</b> |
| Swab-/saliva-                  | 37               | 2 (5.4)          | 21 (56.8)        | 1(2.70)         | 0               | 20 (54.0)        | 0              |
| Swab-/saliva+                  | 0                | 0                | 0                | 0               | 0               | 0                | 0              |
| Swab+/saliva-                  | 12               | 1 (8.3)          | 9(75.0)          | 4 (33.3)**      | 0               | 7 (58.3)         | 3(25.0)*       |
| Swab+/saliva+                  | 24               | 0                | 14 (58.3)        | 0               | 1 (4.17)        | 12 (50.0)        | 1 ( 4.17)      |
| <b>Total (Adults+Children)</b> | <b>94</b>        | <b>3 (3.2)</b>   | <b>59 (62.8)</b> | <b>6 (6.4)</b>  | <b>1 (1.06)</b> | <b>55 (58.6)</b> | <b>5 (5.3)</b> |
| Swab-/saliva-                  | 42               | 2 (4.8)          | 24 (57.1)        | 1 (2.4)         | 0               | 23 (54.8)        | 0              |
| Swab-/saliva+                  | 0                | 0                | 0                | 0               | 0               | 0                | 0              |
| Swab+/saliva-                  | 12               | 1 (8.3)*         | 9 (75.0)         | 4 (33.3)**      | 0               | 7 (58.3)         | 3 (25.0)**     |
| Swab+/saliva+                  | 40               | 0                | 26 (65.0)        | 1 (2.50)        | 1 (2.50)        | 25 (62.5)        | 2(5.00)        |

544 +, positive; -, negative; \*p<0.1, \*\*p<0.05 by Pearson's Chi2 test.

545

546

547

## Supplementary Materials for

548

549

550 *Saliva molecular testing bypassing RNA extraction is suitable for monitoring and*  
551 *diagnosing SARS-CoV-2 infection in children*

552

553 **Authors:** Marta Alenquer<sup>1</sup>, Tiago Milheiro Silva<sup>2, §</sup>, Onome Akpogheneta<sup>3, §</sup>, Filipe  
554 Ferreira<sup>1</sup>, Sílvia Vale-Costa<sup>1</sup>, Mónica Medina-Lopes<sup>1</sup>, Frederico Batista<sup>4</sup>, Ana Margarida  
555 Garcia<sup>3</sup>, Vasco M. Barreto<sup>5</sup>, Cathy Paulino<sup>6</sup>, João Costa<sup>6</sup>, João Sobral<sup>6</sup>, Maria Diniz-da-  
556 Costa<sup>6</sup>, Susana Ladeiro<sup>6</sup>, José Delgado Alves<sup>4,5</sup>, Ricardo B. Leite<sup>6</sup>, Jocelyne Demengeot<sup>3</sup>,  
557 Maria João Rocha Brito<sup>2</sup>, and Maria João Amorim<sup>1,\*</sup>

558

559 **This file includes:**

560 eFigure 1. Standard curves obtained by RT-qPCR amplification of dilution series of synthetic  
561 copies of SARS-CoV-2 (20000 to 20) in fresh negative saliva samples, using the  
562 N1 and the N2 primer-probe sets.

563 eFigure 2. COVID-19 rapid antigen test detects SARS-CoV-2 in saliva samples positive and  
564 with CT values up to 26.

565

566

567

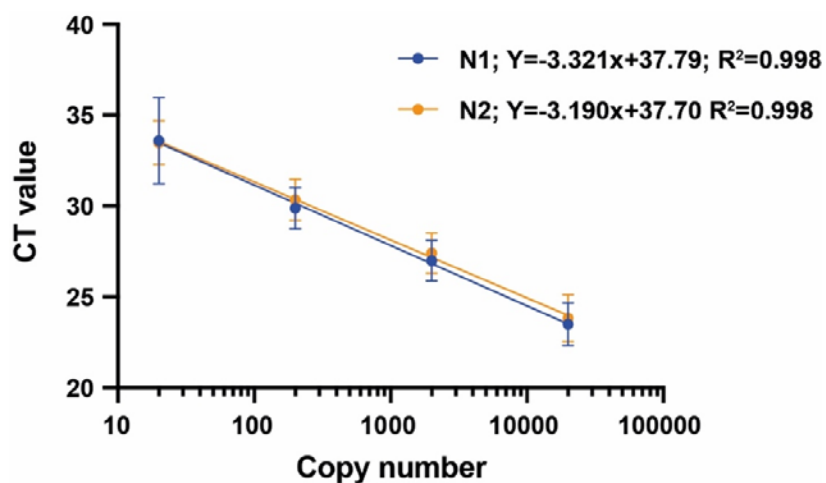

568

569 **eFigure 1.** Standard curves obtained by RT-qPCR amplification of dilution series of  
570 synthetic copies of SARS-CoV-2 (20000 to 20) in fresh negative saliva samples, using the N1  
571 and the N2 primer-probe sets. The obtained cycle threshold (CT) values were plotted vs. the  
572 copy number on a logarithmic scale. Each sample was run in quadruplicate. Error bars  
573 indicate the standard deviation.

574



575

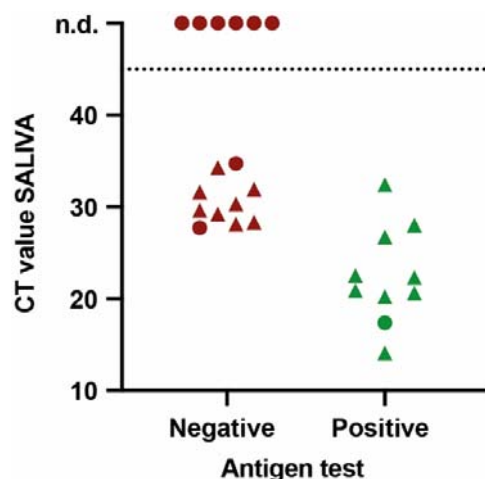

576  
577  
578

579 **eFigure 2.** COVID-19 rapid antigen test detects SARS-CoV-2 in saliva samples positive and  
580 with CT values up to 26. Graphical representation of CT values in saliva after RNA  
581 extraction vs. rapid antigen test result, with dots representing symptomatic children, triangles  
582 asymptomatic patients. n.d., not-detected. The COVID-19 antigen rapid test from ALL TEST  
583 (ref. ICOV-502) was used accordingly to the manufacturer's instructions, with the exception  
584 that instead of NP swab, saliva samples diluted 1:2 in extraction buffer were used.

585  
586  
587
